# Supplementary material
Source: Research Square preprint supplement (doi:10.21203/rs.3.rs-9516499/v1)
Supplement: Supplementary file 2 [file 0f933e6f9768acbf0980f890.docx]

**Supplementary Information**

**MED20 biallelic pathogenic variants cause a neurodevelopmental disorder altering both transcription activity and Transcription-Coupled Repair pathway**

**Genetic vignettes of the individuals reported herein with biallelic pathogenic *MED20* variants**

Family 1, Individual 1 (France). The proband (P1) is the first-born child from French family 1 initially addressed to our center for suspected Cockayne syndrome. After negative *CSA/ERCC6* and *ERCC8/CSB* as well as gene panel screening1, trio exome sequencing in family 1 revealed the presence of two compound heterozygous variants in *MED20* (NM_004275.5) in the proband: a 1-bp deletion (c.326del) leading to the frameshift p.(Lys109Argfs*16) inherited from the mother and a c.475G>C substitution leading to the missense p.(Glu159Gln) inherited from the father (Figure 1A, 1B, Extended data Fig.1 and Supplementary Table 1). The healthy sister is heterozygous carrier of one of the two variants. The deletion has never been reported in the Genome Aggregation Database (gnomAD v2.1.1). The missense variant p.(Glu159Gln) is extremely rare in gnomAD (allele frequency 0.000007973).

Family 2, individuals P2 and P3 (Austria). Individuals P2 and P3 are affected sisters from a consanguineous union, previously reported as homozygous for the rare c.341G>C p.(Gly114Ala) missense variant in *MED20*.

Family 3, individuals P4 and P5 (USA), and family 4, individuals P6, P7 and P8 (Senegal). Two consanguineous families of Senegalese origin had affected siblings homozygous for the c.253C>T p.(Leu85Phe) missense variant (Figure 1A, 1B and Supplementary Table 1). The parents and unaffected sister of individuals P4 and P5 were found to be heterozygous for the *MED20* variant. In addition to the homozygous *MED20* variants, individuals P4 and P5 are also heterozygous for a splice variant in sodium voltage-gated channel beta subunit 1 gene(*SCN1B,* [MIM 60023]) inherited from their mother. Heterozygous pathogenic variants in this gene lead to generalized epilepsy with febrile seizures, type 1 [MIM 604233] and familial atrial fibrillation, 13 [MIM 615377] and both phenotypes are known to have reduced penetrance2,3. Individuals P4 and P5 both had febrile seizures and generalized epilepsy; however, their mother did not have a known history of seizures. They were also found to be heterozygous for a variant of uncertain significance in the *RET* gene, c.1009G>A, p.E337K), known to be associated with Hirschprung disease, and individual P5 had biopsy-confirmed Hirschsprung disease.

**Clinical vignettes of the individuals reported herein with biallelic pathogenic variants in *MED20***

Family 1, individual P1 (France). This female individual is born to non-consanguineous parents (Fig.1C). She presented from early infancy with severe global developmental delay and bilateral congenital cataracts. She never achieved independent ambulation or expressive speech. Neurological examination revealed early-onset spasticity associated with progressive disabling dystonia and progressive microcephaly (−1.5 SD at birth, −4 SD by 4 years). She developed epileptic seizures, which have been well controlled with sodium valproate and lamotrigine. Brain MRI demonstrated diffuse cortical and subcortical atrophy, cerebellar and brainstem hypoplasia, posterior falx cerebri calcifications. Visual evoked potentials showed evidence of demyelinating visual pathway dysfunction. Additional findings included severe scoliosis requiring surgery at 13 years and choanal atresia. By the last clinical evaluation at 17 years, the patient was bedridden, with no visual contact but preserved auditory reactivity.

Family 2, individuals P2 and P3 (Austria). Individuals P2 and P3 are affected sisters from a consanguineous union. Developmental delay was evident from early infancy, with strabismus noted since birth. Both individuals achieved assisted walking at 2.5 years but never attained independent ambulation and subsequently became wheelchair-dependent (at age 10 and 14 years, respectively). Expressive speech was absent in both, while receptive language remained limited to an early developmental level. Progressive neurological deterioration was observed from early childhood, including infantile-onset spasticity, severe and progressive ataxia, and peripheral neuropathy confirmed by nerve conduction studies in one case. Motor regression was marked by loss of assisted walking (at 6 and 10 years, respectively), with further decline including loss of crawling and nonverbal communication skills in one individual. Ophthalmological features included bilateral childhood-onset cataracts requiring surgery and convergent strabismus. Epilepsy was absent in one sibling and suspected in the other during adolescence. Both individuals were described as having a consistently cheerful and friendly disposition. Both patients exhibited a recognizable pattern of facial dysmorphism, including almond-shaped eyes with down slanting palpebral fissures, a thin upper lip vermilion, a long-curved nose with prominent columella, and prominent eyebrows, along with features consistent with muscular hypotonia (open mouth, high arched palate, deep set ears). Head circumference was initially normal or above average, followed by progressive microcephaly in one individual. Brain MRI revealed progressive cerebral and cerebellar atrophy with basal ganglia involvement in both patients (in P2: cerebral atrophy, alterations of the basal ganglia, thinning of the isthmus of the corpus callosum, and moderate cerebellar atrophy at 2 years and 7 months of age, progressive and symmetric atrophy and T2 hyperintensity of basal ganglia at the age of 16 years; in P3: cerebellar and cerebral atrophy, enlarged ventricles, and atrophy of basal ganglia at 16 months of age). Additional features included scoliosis requiring surgical correction in one patient. Symptomatic treatment with levodopa and gabapentin resulted in partial clinical improvement.

Family 3, individuals P4 and P5 (USA). Individuals P4 and P5 are affected brothers from a consanguineous Wolof family originating from Senegal. Both were born at term after uncomplicated pregnancies with normal head circumferences. Developmental delay was evident from early infancy. Epilepsy occurred in both individuals, with onset in the first year of life and good control under levetiracetam, and was attributed to a pathogenic variant in *SCN1B*. Hirschsprung disease was diagnosed in P4 at 18 months and probably associated with a pathogenic variant in *RET*. Motor milestones were delayed, with independent walking achieved at 2–2.5 years in both siblings. A progressive neurological course was observed, characterized by truncal ataxia and spasticity, leading to motor regression. P5 lost independent ambulation and became wheelchair-dependent by age 11, whereas P4, currently 21 years old, remains ambulatory but has developed increasing gait difficulties and is no longer able to run. Both individuals exhibited regression of expressive language occurring in parallel with motor decline, while receptive language appeared relatively preserved. Ophthalmological findings in P4 included bilateral juvenile cataracts requiring surgical intervention. Skeletal involvement included progressive scoliosis and joint contractures. Brain MRI demonstrated mild inferior vermian hypoplasia in P4, and progressive ventriculomegaly with mild cerebellar volume loss in P5. Both individuals were described as having a consistently cheerful and friendly disposition. Both patients exhibited facial dysmorphic features: P4 showed bilateral mild epicanthal folds, sparse arched eyebrows, high arched palate, prominent and slightly upturned ear lobes, slight retrognathia, but no micrognathia; P5 showed bilateral epicanthal folds, narrow palpebral fissures, cupped ears, very high arched and narrow palate, full lips, slight retrognathia, but no micrognathia.

Family 4, individuals P6, P7 and P8 (Senegal). Family 4 is an extended consanguineous family with 3 affected adult siblings (individuals P6, P7 and P8), currently aged 29, 25 and 22 years. All three present a similar, non-progressive neurodevelopmental phenotype with early-onset global developmental delay and persistent intellectual disability. Expressive language has not developed, whereas receptive language is partially preserved, and there is no clinical evidence of hearing impairment. All siblings had bilateral childhood-onset cataracts treated surgically. No epileptic seizures have been reported, and there has been no developmental regression; overall, the clinical course has remained stable. All three individuals were described as having a consistently cheerful and friendly disposition. Dysmorphic features were noted in two of the siblings including depressed nasal bridge, hypertelorism and malocclusion with increased overjet. The neurological examination revealed predominantly dystonic and spastic features affecting both upper and lower limbs, including distal dystonic postures in upper limbs and increased muscle tone in the lower limbs. Gait was clearly abnormal, with mildly flexed elbows and knees, foot dragging, adducted knees, and overall predominance of spasticity feet and touching knees and predominantly spastic features. There were no definite cerebellar signs, apart from mild dysmetria in individual P6. A head CT scan in individual P6 at age 28 years was suggestive of mild cerebral atrophy. Stature and weight were appropriate for age in all three individuals.

**Extended references**

1. Calmels, N. *et al.* Uncommon nucleotide excision repair phenotypes revealed by targeted high-throughput sequencing. *Orphanet Journal of Rare Diseases* **11**, 26 (2016).

2. Al-Ward, H. *et al.* Voltage-Gated Sodium Channel β1 Gene: An Overview. *Hum Hered* **85**, 101–109 (2020).

3. Zhu, Z. *et al.* SCN1B Genetic Variants: A Review of the Spectrum of Clinical Phenotypes and a Report of Early Myoclonic Encephalopathy. *Children (Basel)* **9**, 1507 (2022).

4. Jaganathan, K. *et al.* Predicting Splicing from Primary Sequence with Deep Learning. *Cell* **176**, 535-548.e24 (2019).

5. Leman, R. *et al.* SPiP: Splicing Prediction Pipeline, a machine learning tool for massive detection of exonic and intronic variant effects on mRNA splicing. *Hum Mutat* **43**, 2308–2323 (2022).

6. Kumar, P., Henikoff, S. & Ng, P. C. Predicting the effects of coding non-synonymous variants on protein function using the SIFT algorithm. *Nat Protoc* **4**, 1073–1081 (2009).

7. Adzhubei, I. A. *et al.* A method and server for predicting damaging missense mutations. *Nat Methods* **7**, 248–249 (2010).

8. Cheng, J. *et al.* Accurate proteome-wide missense variant effect prediction with AlphaMissense. *Science* **381**, eadg7492 (2023).

9. Schubach, M., Maass, T., Nazaretyan, L., Röner, S. & Kircher, M. CADD v1.7: using protein language models, regulatory CNNs and other nucleotide-level scores to improve genome-wide variant predictions. *Nucleic Acids Res* **52**, D1143–D1154 (2024).
