# Supplementary material
Source: Research Square preprint supplement (doi:10.21203/rs.3.rs-9516499/v1)
Supplement: Supplementary file 3 [file 3ad89e8c71fab1d53f2382da.pdf]

## **Supplementary Tables**

**MED20 biallelic pathogenic variants cause a neurodevelopmental disorder altering both transcription activity and Transcription-Coupled Repair pathway**

**Supplementary Table 1**

|                                | <b>Family 1<br/>(France)</b>    | <b>Family 2<br/>(Austria)</b>                                                                              |                                                                                                          | <b>Family 3<br/>(USA)</b>                           |                                                                                                | <b>Family 4<br/>(Senegal)</b>                    |                                                  |                                                  |
|--------------------------------|---------------------------------|------------------------------------------------------------------------------------------------------------|----------------------------------------------------------------------------------------------------------|-----------------------------------------------------|------------------------------------------------------------------------------------------------|--------------------------------------------------|--------------------------------------------------|--------------------------------------------------|
| <b>Individual</b>              | <b>1</b>                        | <b>2</b>                                                                                                   | <b>3</b>                                                                                                 | <b>4</b>                                            | <b>5</b>                                                                                       | <b>6</b>                                         | <b>7</b>                                         | <b>8</b>                                         |
| Variant, DNA                   | c.326del<br>c.475G>C            | c.341G>C<br>(homozygous)                                                                                   | c.341G>C<br>(homozygous)                                                                                 | c.253C>T<br>(homozygous)                            | c.253C>T<br>(homozygous)                                                                       | c.253C>T<br>(homozygous)                         | c.253C>T<br>(homozygous)                         | c.253C>T<br>(homozygous)                         |
| Variant, protein               | p.Lys109Argfs*16<br>p.Glu159Gln | p.Gly114Ala                                                                                                | p.Gly114Ala                                                                                              | p.Leu85Phe                                          | p.Leu85Phe                                                                                     | p.Leu85Phe                                       | p.Leu85Phe                                       | p.Leu85Phe                                       |
| Gender                         | F                               | F                                                                                                          | F                                                                                                        | M                                                   | M                                                                                              | M                                                | M                                                | M                                                |
| Age at last report (y)         | 17                              | 16                                                                                                         | 14                                                                                                       | 14                                                  | 21                                                                                             | 29                                               | 25                                               | 22                                               |
| Deceased                       |                                 | At age 16                                                                                                  |                                                                                                          |                                                     |                                                                                                |                                                  |                                                  |                                                  |
| Presenting symptoms            | Developmental delay             | Strabismus since birth;<br>Developmental delay                                                             | Strabismus since birth;<br>Developmental delay                                                           | Developmental delay                                 | Developmental delay                                                                            | Developmental delay                              | Developmental delay                              | Developmental delay                              |
| Age at independent walking (y) | No independent walking          | Walk with assistance at 2.5 y, never reached independent walking, W wheelchair-bound since the age of 10 y | Walk with assistance at 2.5 y, never reached independent walking, wheelchair-bound since the age of 14 y | Walked and ran at 2 y, wheelchair bound by age 11 y | 2.5 Still able to walk and run at 15 y, decreased ambulatory capacity at 21 y with ataxic gait | 3                                                | 3                                                | 3                                                |
| Speech                         | Absence of expression speech    | Absence of expression speech, language perception                                                          | Absence of expression speech, language perception                                                        | Difficulties of speech (1-2 words)                  | Difficulties of speech (50 words)                                                              | No expressive speech; partial receptive language | No expressive speech; partial receptive language | No expressive speech; partial receptive language |

|                         |                                |                                                                                 |                                                                                       |                                                                |                                                                |                                       |                                       |                                       |
|-------------------------|--------------------------------|---------------------------------------------------------------------------------|---------------------------------------------------------------------------------------|----------------------------------------------------------------|----------------------------------------------------------------|---------------------------------------|---------------------------------------|---------------------------------------|
|                         |                                | appropriate to the developmental stage of early childhood                       | appropriate to the developmental stage of early childhood, uses communication devices |                                                                |                                                                |                                       |                                       |                                       |
| Intellectual disability | Yes, severe                    | Yes                                                                             | Yes                                                                                   | Yes, moderate                                                  | Yes, moderate                                                  | Yes, moderate                         | Yes, moderate                         | Yes, moderate                         |
| Eyes                    | Bilateral congenital cataracts | Bilateral cataracts (childhood onset, surgery at 11 y)<br>Convergent strabismus | Bilateral cataracts (childhood onset, surgery at 9 y)<br>Convergent strabismus        | No cataracts                                                   | Bilateral cataracts (childhood onset, surgery at 6 y)          | Bilateral cataracts (childhood onset) | Bilateral cataracts (childhood onset) | Bilateral cataracts (childhood onset) |
| Hearing impairment      | No                             | No                                                                              | No                                                                                    | No                                                             | No                                                             | No                                    | No                                    | No                                    |
| Seizures                | Yes                            | No                                                                              | Suspected at the age of 14 y                                                          | Yes                                                            | Yes                                                            | No                                    | No                                    | No                                    |
| Dystonic signs          | Yes, progressive and severe    | Yes from the age of 3 y, progressive and severe                                 | Yes<br>Progressive, severe                                                            | Mild                                                           | Mild                                                           | Mild                                  | Moderate                              | Moderate                              |
| Pyramidal signs         | Infantile onset spasticity     | Infantile onset spasticity                                                      | Infantile onset spasticity                                                            | Moderate to severe, progressive spasticity, moderate dysmetria | Moderate progressive spasticity, hyperreflexia, mild dysmetria | Mild spasticity                       | Moderate spasticity                   | Moderate spasticity                   |
| Cerebellar signs        | Yes                            | Yes                                                                             | Yes                                                                                   | Yes                                                            | Yes                                                            | Mild                                  | No                                    | No                                    |
| Sensorimotor Neuropathy | ND                             | Yes (confirmed on EMG/NCS)                                                      | ND                                                                                    | ND                                                             | ND                                                             | ND                                    | ND                                    | ND                                    |

|                                                            |                                                       |                                                                               |                                                                                                                                                       |                                                            |                                            |                       |        |        |
|------------------------------------------------------------|-------------------------------------------------------|-------------------------------------------------------------------------------|-------------------------------------------------------------------------------------------------------------------------------------------------------|------------------------------------------------------------|--------------------------------------------|-----------------------|--------|--------|
| Progressive neurological features /loss of acquired skills | Yes                                                   | Yes, from the age of 3 y, loss of assistant walking at 6 y                    | Yes from the age of 3 y, loss of assisted walking at 10 y, loss of crawling at age 14 y, loss of nonverbal communication skills since the age of 10 y | Yes, loss of ambulation and speech at 11 y                 | Stable                                     | Stable                | Stable | Stable |
| Behavior : cheerful disposition                            | Yes (initially, before cognitive decline)             | Yes                                                                           | Yes                                                                                                                                                   | Yes                                                        | Yes                                        | Yes                   | Yes    | Yes    |
| Dysmorphic features (see supplemental data for details)    | Yes                                                   | Yes                                                                           | Yes                                                                                                                                                   | Yes                                                        | Yes                                        | Yes                   | No     | Yes    |
| Growth                                                     | Poor weight gain                                      | Normal                                                                        | Normal                                                                                                                                                | Normal height, poor weight gain beginning at age 10 y      | Normal                                     | Normal                | Normal | Normal |
| Head circumference                                         | Progressive microcephaly -1.5SD at birth, -4SD at 4 y | 80 <sup>th</sup> centile at 13 months then microcephaly <- 3SD from age 4.5 y | 90 <sup>th</sup> centile at 2.5 y                                                                                                                     | 50th centile at birth and (53 cm) 30th centile at age 12 y | (55.2 cm) 62 <sup>nd</sup> centile at 13 y | ND                    | ND     | ND     |
| Brain imaging                                              | Cerebral and cerebellar atrophy, brainstem            | Progressive cerebral atrophy and cerebellar                                   | Cerebral and cerebellar atrophy, enlarged                                                                                                             | Cerebral and cerebellar atrophy,                           | Mild inferior vermian hypoplasia           | Mild cerebral atrophy | ND     | ND     |

|                      |                                               |                                                                                                            |                                              |                                                                                                                                                                                                        |                                                                                                                                                                                                        |    |    |
|----------------------|-----------------------------------------------|------------------------------------------------------------------------------------------------------------|----------------------------------------------|--------------------------------------------------------------------------------------------------------------------------------------------------------------------------------------------------------|--------------------------------------------------------------------------------------------------------------------------------------------------------------------------------------------------------|----|----|
|                      | hypoplasia, calcification in the falx cerebri | atrophy, with progressive alterations of the basal ganglia, thinning of the isthmus of the corpus callosum | ventricles, and atrophy of the basal ganglia | enlarged ventricles                                                                                                                                                                                    |                                                                                                                                                                                                        |    |    |
| Other manifestations | Choanal atresia, scoliosis (surgery at 13 y)  | Scoliosis (surgery at 16 y)                                                                                |                                              | Hirschsprung disease, scoliosis                                                                                                                                                                        | Scoliosis, genu valgum, unilateral cryptorchidism                                                                                                                                                      | No | No |
| Treatment response   | Improvement with levodopa                     |                                                                                                            | Improvement with levodopa and gabapentin     |                                                                                                                                                                                                        |                                                                                                                                                                                                        |    |    |
| Other Variants       |                                               |                                                                                                            |                                              | <p><i>SCN1B</i><br/>c.253C&gt;T;p.(L385F)<br/>pathogenic, presumed to be cause of seizures;</p> <p>RET<br/>c.1009G&gt;A;p.(E337K) VUS;<br/>likely the cause of Hirschsprung disease in this family</p> | <p><i>SCN1B</i><br/>c.253C&gt;T;p.(L385F)<br/>pathogenic, presumed to be cause of seizures;</p> <p>RET<br/>c.1009G&gt;A;p.(E337K) VUS;<br/>likely the cause of Hirschsprung disease in this family</p> |    |    |

## Supplementary Table 2

| <b>cDNA (c.)</b> | <b>Protein (p.)</b> | <b>CADD</b> | <b>PolyPhen-2</b>                  | <b>SIFT</b>           | <b>AlphaMissense</b>          | <b>SPiP</b> | <b>SpliceAI</b> |
|------------------|---------------------|-------------|------------------------------------|-----------------------|-------------------------------|-------------|-----------------|
| c.253C>T         | p.(Leu85Phe)        | 24.3        | Probably damaging<br>(0.999/0.961) | Tolerated<br>(0.09)   | Likely pathogenic<br>(0.6886) | NC          | NC              |
| c.341G>C         | p.(Gly114Ala)       | 27.4        | Probably damaging<br>(0.997/0.97)  | Deleterious<br>(0.00) | Likely pathogenic<br>(0.9856) | NC          | NC              |
| c.475G>C         | p.(Glu159Gln)       | 26.5        | Probably damaging<br>(0.993/0.957) | Deleterious<br>(0.00) | Likely pathogenic<br>(0.916)  | NC          | NC              |

!

### Supplementary Table 3

| Patient | Family | Chr | Start      | End        | Length (Mb) | #SNP  | Total Homozygosity (Mb) |
|---------|--------|-----|------------|------------|-------------|-------|-------------------------|
| P6      | 4      | 6   | 37,116,078 | 42,282,393 | 5.17        | 1,494 | 30.1                    |
| P7      | 4      | 6   | 37,116,078 | 42,282,393 | 5.17        | 1,494 | 123.75                  |
| P8      | 4      | 6   | 37,116,078 | 42,282,393 | 5.17        | 1,494 | 52.16                   |
| P4      | 3      | 6   | 36,974,212 | 45,743,286 | 8.77        | 2,436 | 159.06                  |

## Supplementary Table 4

### Alignment 1

```

Hs MED20 1  MGVTCVSQMPVAEGKSVQQTVELLTRKLEMLGAEKQGTFCVDCETYHTAASTLGSQQGTGKLMYVMHNSEYPLSCFALFE 80
Sc Med20 1  MGKSAVIFVERATPATLTELKDALSNSI----LSVRDPWSIDFRTRYRCSIKNL--PADVSKLMYSITFHHHGRQTVLIKD 74

Hs MED20 81  NGP-----CQI-----IADTNFDVLMVKLKGFFQSAKASKIETRGTRYQYCDFLVKVGTVTMGPSARGISV 140
Sc Med20 75  NSAMVTTAAADIPPALVFNGSSTGVPEPIDTILSSKLSNIWMQRQLIKGDA-GETLILDGLTVRLVNLFSSTGFKGLLI 153

Hs MED20 141 EVEYGPCVVASDCWSLLLEFLQSFLGSHTPGAPAVFGNRHDAVYGP-----ADTMVQYMELFNKIRKQQQVPVAGIR 212
Sc Med20 154 ELQADEA---GEF-ETKIAGIEGHLAEI-----RAKEYKTSSDSLGPPTSNEICDLAYQYVRALEL 210
  
```

### Alignment 2

```

Hs MED20 1  MGVTCVSQMPVAEGKSVQQTVELLTRKLEMLGAEKQGTFCVDCETYHTAASTLGSQQGTGKLMYVMHNSEYPLSCFALFE 80
Sc Med20 1  MGKSAVIFVERATPATLTELKDALSNSILSV----RDPWSIDFRTRYRCSIKNL--NLPADVSKLMYSITFHHHGRQTVLIKD 74

Hs MED20 81  NGP-----CQI-----IADTNFDVLMVKLKGFFQSAKASKIETRGTRYQYCDFLVKVGTVTMGPSARGISV 140
Sc Med20 75  NSAMVTTAAADIPPALVFNGSSTGVPEPIDTILSSKLSNIWMQRQLIKGDA-GETLILDGLTVRLVNLFSSTGFKGLLI 153

Hs MED20 141 EVEYGPCVVASDCWSLLLEFLQSFLGSHT-PGAPAVFGNRHDAVYGPADTMVQYMELFNKIRKQQQVPVAGIR 212
Sc Med20 154 ELQA---DEAGEFETKIAGIEGHLAEIRAKEYKTSSDSLGPPTSNEICDLAYQYVRALEL 210
  
```

| Hs MED20       | Sc Med20                |
|----------------|-------------------------|
| Leu85Phe       | Ala84Phe and Gly99Phe   |
| Lys109Argfs*16 | Δ123                    |
| Gly114Ala      | Gly127Ala               |
| Glu159Gln      | Ala168Gln and Gly169Gln |

## Supplementary Table 5

```

Ce_MDT20  MGVTWVF-----EAEQTAKSVERLLESIGGDLHGTFIVDVTPFNPPTPSSDY----- 47
Hs_MED20  MGVTCVSQMPVAEGKSVQQTVELLTRKLEMLGAEKQGTFCVDCETYHTAASTLGSQGQTG 60
**** *           ..:**.: : * ** :*.: :*** **   :: : : .

                                77                                101  106
Ce_MDT20  PSNVVMHHSKCPQSTFSICPKDTFKKSPKAVCDRGLILSKLSSGLIADNAGKIEIIGN 107
Hs_MED20  KLMYVMHNSEYPLSCFA-----LFENGPCLIA DTNFDVLMVKLKGFFQSAKASKIETRGT 115
***:*: * * *:           *::.* :.* .**::: **.. : : :*.*** *.

                                151
Ce_MDT20  EYSLYKDW MIRVGTATQGTTVKGVVVEIEYDPSIIVIQCKDMMIEFVKSVFNKYHETLPE 167
Hs_MED20  RYQ-YCDFLVKVGTVTMGPSARGISVEVEYGPCVVASDCWSLLIEFLQSFLGSHTPGAPA 174
.*. * *:::***.* * :.:*: **:**.*.:. :* .:::**:*.:.:. : *

Ce_MDT20  IFKITEKPESY TALDTMWQYLG IATKLRKKT----- 198
Hs_MED20  VFGNR-HDAVYGPADTMVQYMELFNKIRKQQQVPVAGIR 212
:*      :   *   *** **: : .*:**:

```

| Hs MED20       | Ce MDT-20                    |
|----------------|------------------------------|
| Leu85Phe       | Not conserved                |
| Lys109Argfs*16 | Lys101Argfs*2 (conserved aa) |
| Gly114Ala      | Gly106Ala (conserved aa)     |
| Glu159Gln      | Glu152Gln (conserved aa)     |

## Supplementary Table 6

| Name                     | Genotype                                                                                       | Collection |
|--------------------------|------------------------------------------------------------------------------------------------|------------|
| YPH499                   | <i>MATa ura3-52 lys2-801 ade2-101 trp1-Δ63 his3-Δ200 leu2-Δ1</i>                               | Y8270      |
| <i>med20-A84F</i>        | <i>MATa ura3-52 lys2-801 ade2-101 trp1-Δ63 his3-Δ200 leu2-Δ1 med20-A84F::kanMX</i>             | Y8064      |
| <i>med20-G99F</i>        | <i>MATa ura3-52 lys2-801 ade2-101 trp1-Δ63 his3-Δ200 leu2-Δ1 med20-G99F::kanMX</i>             | Y8065      |
| <i>med20-G127A</i>       | <i>MATa ura3-52 lys2-801 ade2-101 trp1-Δ63 his3-Δ200 leu2-Δ1 med20-G127A::kanMX</i>            | Y8066      |
| <i>med20-A168Q</i>       | <i>MATa ura3-52 lys2-801 ade2-101 trp1-Δ63 his3-Δ200 leu2-Δ1 med20-A168Q::kanMX</i>            | Y8067      |
| <i>med20-G169Q</i>       | <i>MATa ura3-52 lys2-801 ade2-101 trp1-Δ63 his3-Δ200 leu2-Δ1 med20-G169Q::kanMX</i>            | Y8063      |
| <i>med20Δ-123</i>        | <i>MATa ura3-52 lys2-801 ade2-101 trp1-Δ63 his3-Δ200 leu2-Δ1 med20Δ123::kanMX</i>              | Y8055      |
| <i>med20Δ</i>            | <i>MATa ura3-52 lys2-801 ade2-101 trp1-Δ63 his3-Δ200 leu2-Δ1 med20::kanMX</i>                  | Y8059      |
| YPH499 <i>rad7Δ</i>      | <i>MATa ura3-52 lys2-801 ade2-101 trp1-Δ63 his3-Δ200 leu2-Δ1 rad7::HIS3</i>                    | Y8275      |
| <i>med20-A84F rad7Δ</i>  | <i>MATa ura3-52 lys2-801 ade2-101 trp1-Δ63 his3-Δ200 leu2-Δ1 med20-A84F::kanMX rad7::HIS3</i>  | Y8070      |
| <i>med20-G99F rad7Δ</i>  | <i>MATa ura3-52 lys2-801 ade2-101 trp1-Δ63 his3-Δ200 leu2-Δ1 med20-G99F::kanMX rad7::HIS3</i>  | Y8071      |
| <i>med20-G127A rad7Δ</i> | <i>MATa ura3-52 lys2-801 ade2-101 trp1-Δ63 his3-Δ200 leu2-Δ1 med20-G127A::kanMX rad7::HIS3</i> | Y8072      |
| <i>med20-A168Q rad7Δ</i> | <i>MATa ura3-52 lys2-801 ade2-101 trp1-Δ63 his3-Δ200 leu2-Δ1 med20-A168Q::kanMX rad7::HIS3</i> | Y8073      |
| <i>med20-G169Q rad7Δ</i> | <i>MATa ura3-52 lys2-801 ade2-101 trp1-Δ63 his3-Δ200 leu2-Δ1 med20-G169Q::kanMX rad7::HIS3</i> | Y8196      |
| <i>med20Δ-123 rad7Δ</i>  | <i>MATa ura3-52 lys2-801 ade2-101 trp1-Δ63 his3-Δ200 leu2-Δ1 med20Δ123::kanMX rad7::HIS3</i>   | Y8166      |
| <i>med20Δ rad7Δ</i>      | <i>MATa ura3-52 lys2-801 ade2-101 trp1-Δ63 his3-Δ200 leu2-Δ1 med20::kanMX rad7::HIS3</i>       | Y8076      |

## Supplementary Table 7

| Genes           | Forward                                          | Reverse                  |
|-----------------|--------------------------------------------------|--------------------------|
| <i>GAPDH</i>    | Hs_GAPDH_1_SG QuantiTect Primer Assay QT00079247 |                          |
| <i>MED20</i>    | Hs_MED20_1_SG QuantiTect Primer Assay QT00043505 |                          |
| <i>GAPDH</i>    | gagtcactggctctcac                                | ggactgtggtcatgagtcctc    |
| <i>CDK5RAP2</i> | acagacaaccagcacctgaaga                           | tccttgctagccagaagctctgtt |
| <i>NIPBL</i>    | tctggccggtgtctggcaattca                          | ttagcctgtgcacatgtgtaggt  |
|                 | aggacgtcttaatggcacagga                           | atgaggagagtctcggtaggaa   |

## Supplementary Table 8

| Antibodies     | Host   | References     | Manufacturer             |
|----------------|--------|----------------|--------------------------|
| ATF3           | Rabbit | Ab207434       | Abcam                    |
| B-tubulin      | Mouse  | AG-tub-2012    | Euromedex                |
| GAPDH          | Mouse  | GT239          | Genetex                  |
| CPD            | Mouse  | CAC-NM-DND-001 | Cosmo-bio                |
| 6-4PP          | Mouse  | CAC-NM-DND-002 | Cosmo-bio                |
| RNAPII         | Rat    | #61081         | Active Motif             |
| RNAPII         | Mouse  | #39097         | Active Motif             |
| RNAPII S5P     | Mouse  | #91119         | Active Motif             |
| RNAPII S2P     | mouse  | #91115         | Active Motif             |
| TFIIB          | Rabbit | GTX107327      | Genetex                  |
| XPD            | Rabbit | #NBP3-15112    | Bio-Techne               |
| MAT-1          | Rabbit | H719-1-AP      | ProteinTech              |
| CDK7           | Rabbit | BE-A300-405A   | Bethyl                   |
| CDK9           | Rabbit | sc8338         | Santa Cruz Biotechnology |
| TFIIE $\alpha$ | Mouse  | #2A1           | IGBMC                    |
| XPC            | Rabbit | A301-122A      | Bethyl                   |
| Flag           | Mouse  | MA1-91878      | Thermofischer            |
| MED4           | Rabbit | ab129170       | Abcam                    |
| MED8           | Rabbit | PA5-50053      | Thermofischer            |
| MED17          | Mouse  | #00009440-MA2  | Abnova                   |
| MED18          | Rabbit | 15352-1AP      | ProteinTech              |
| MED20          | Rabbit | 17598-1        | ProteinTech              |
| MED27          | Mouse  | sc-390295      | Santa Cruz Biotechnology |
