# Supplementary material
Source: Research Square preprint supplement (doi:10.21203/rs.3.rs-9516499/v1)
Supplement: Supplementary file 7 [file 7094e1d4c832c4cb5c3bdefd.docx]

**Extended Data**

**Extended data Figure 1:**

Identification of two heterozygous variants in *MED20* in Family 1 explored by trio ES. IGV visualization of the two identified pathogenic variants. Two compound heterozygous variants in the *MED20* (NM_004275.5) in P1: a 1-bp deletion c.326del leading to the frameshift p.(Lys109Argfs*16) inherited from the mother and the substitution c.475G>C leading to the missense p.(Glu159Gln) inherited from the father.

**Extended data Figure 2:**

(A) MED20 mRNA detection by PCR from cDNA retro-transcribed from parental and patients derived fibroblasts.

(B) These PCR fragments have been purified and sequenced by Sanger method allowing the detection of the different variants. Electropherograms representing the Sanger sequencing at the position of the different variants from the corresponding patients.

(C) Relative MED20 protein expression measured by western blot from nuclear extracts of P1 fibroblasts treated either with DMSO or proteasome inhibitor MG132. GAPDH was used as a loading control to assess relative protein levels.

(D) Relative MED20 protein expression measured by western blot from nuclear extracts of HEK293T cells transiently transfected with pULTRA vector expressing Flag-tagged-WT-MED20 or the indicated variants. Cells transfected with empty vector served as a negative control. Expression levels of overexpressed Flag-MED20 were detected using an anti-Flag antibody. β-tubulin was used as a loading control to assess relative protein levels.

**Extended data Figure 3:**

MED20 structural predictions.

(A and B) Wild-type and predicted mutant conformations and interactions for the p.Leu85Phe substitution. Phe85 is predicted to introduce a steric clash with Asn113, inducing a side chain conformational change, and to modify the network of interactions with MED18.

(C and D) Wild-type and predicted mutant conformations for the p.Gly114Ala substitution. The Gly114 residue is part of a β strand and contributes to an 8-stranded antiparallel β sheet structure. The substitution of the buried Gly114 is predicted to introduce deformity in the β-sheet and destabilization of this region.

(E and F) Wild-type and predicted mutant conformations and interactions for the p.Glu159Gln substitution. The side chain of Glu159 forms hydrogen bonds with the amide bond of Phe287, which is predicted to be preserved by the substitution but requires a side chain reorientation and disruption of hydrophobic interactions with Phe287 of MED27.

**Extended data Figure 4:**

Optical biosensing analysis of the binding of MED20 WT and pathogenic variants to MED18. (A-E) Representative BLI sensorgrams and fitting curves of immobilized MED18 with serial dilution of GST-MED20 WT (A), p.Leu85Phe (B), p.Glu159Gln (C), p.Gly114Ala (D) and GST (E). Global fit of the data to a 1:1 binding model is shown in red.

**Extended data Figure 5:**

Overview of *MED20* variants identified in this study on the nucleosome-bound PIC-Mediator complex (PDB 8GXQ). Zoom-in box representing MED20 (cyan), MED18 (pink), MED8 (purple) and MED27 (green). MED20 mutations shown in red destabilize interactions with Mediator subunits, and Mediator assembly, potentially affecting the stability of the overall structure of the PIC-Mediator complex.

**Extended data Figure 6:**

(A) Recovery of RNA synthesis (RRS) assay in Ctrl, CS and MED20 (P1, P2, P4) fibroblasts. Cells were exposed to UV irradiation (15 J/m2)and nascent RNA synthesis was measured through EU incorporation at 6- and 24-h post-UV irradiation. This panel shows representative fluorescence images of EU incorporation (green) with nuclear counterstaining using Hoechst 33258 (cyan). Scale bar, 10 µm.

(B) TCR-specific Unscheduled DNA synthesis (TC-UDS) assay of fibroblasts exposed to localized UV-C (130 J/m²) using 5mm pore filters. DNA synthesis was quantified by EdU incorporation for 1 h post-irradiation. This panel shows representative fluorescence images of EdU incorporation corresponding to DNA synthesis (green) and CPD labelling related to DNA damage (red) with nuclear counterstaining using Hoechst 33258 (cyan). Scale bar, 10 µm.

**Extended data Figure 7:**

(A) Unscheduled DNA synthesis (UDS) assay of non-dividing Ctrl, CS and MED20 (P1, P2, P4) fibroblasts subjected to increasing UV-C doses (0, 5, 10 and 20 J/m2). DNA repair was quantified by EdU incorporation. Each dot represents an individual nucleus (60 nuclei per condition) from a single biological replicate. Statistical analyses were performed on the individual nuclei using one-way ANOVA with Dunnett’s multiple-comparisons test; ****, *P* < 0.0001.

(B) Detection of UV-induced DNA lesions (CPDs and 6-4PPs) using slot-blot assay. Ctrl, CS and MED20 (P1, P2 and P4) fibroblasts were either untreated or UV-irradiated (15 J/m²) and collected at indicated time points. SYBR Gold was used to control DNA loading. Right panels show the quantification of the left panel. Quantifications were normalized to DNA amount. Data are mean ± s.d. from two independent biological replicates, each in technical triplicate. Statistical significance was assessed on the means of biological replicates using one-way ANOVA followed by Dunnett’s multiple-comparisons test; ns, *P* ≥ 0.05; *, *P* < 0.05; **, *P* < 0.01; ***, *P* < 0.001; ****, *P* < 0.0001. Only significant *P*-values are shown.

**Extended data Figure 8:**

(A) Cell confluence (%) measured every 2 h for 5 days of Ctrl, CS and MED20 (P1, P2, P4) fibroblasts cultured either untreated or in medium containing trabectedin (120 pM). Confluence values normalized to initial confluence in each well and expressed relative to untreated control. Data are mean ± s.d. from two independent biological replicates, each in technical triplicate. Statistical significance was assessed on the means of the biological replicates using a two-tailed unpaired t-test; ns, *P* ≥ 0.05; **, *P* < 0.01.

(B) MED20 mRNA and protein levels in HEK293T cells assessed by RT–PCR (left) and protein expression by western blot analysis (right) in cells transduced with lentiviruses expressing the indicated shRNAs. RNA expression levels were normalized to *GAPDH*. Data are mean ± s.d. from two independent biological replicates, each in technical triplicate. Statistical significance was assessed on the means of biological replicates using one-way ANOVA followed by Dunnett’s multiple-comparisons test; ns, *P* ≥ 0.05; *, *P* < 0.05. β-tubulin served as loading control.

(C) Relative Flag-tagged MED20 protein expression detected by western blot using nuclear extracts from HEK293T cells expressing shMED20-resistant Flag-tagged wild-type (WT) MED20 or the indicated variants. Mock cells and cells transduced with control shRNA served as negative controls. Overexpressed Flag–MED20 was detected with an anti-Flag antibody, and β-tubulin served as loading control.

**Extended data Figure 9: Nematodes carrying patient mutations in MDT20 show developmental delay, reduced sensory function and abnormal chemotaxis toward food**.

(A) Delayed-growth phenotypes of *C. elegans* carrying Lys101Argfs*4 in *mdt-20*/*MED20*. The worms were synchronized using timed egg-laying on plates and let develop for 48h at 20°C. *mdt-20/MED20* mutant worms exhibit shorter body length and delay in germline and vulva development compared to control worms. Worms without red marker are homozygous mutant worms, worms with red markers are either control homozygous for the red balancer (strong red) or heterozygous for red balancer and *mdt-20* mutation (fainter red).

(B) Chemotaxis index toward benzaldehyde of different strains tested in non-UV conditions. This is calculated as the proportion of worms reaching the Benz+NaN3 spot divided by the total number of worms reaching either the Benz+NaN3 or EtOH+NaN3 spot. Non-parametric Kruskal-Wallis tests with uncorrected Dunn’s multiple-comparisons were used.

(C) Chemotaxis of different worm strains toward OP50 bacteria. Percentage of worms in the control region (LB+NaN3), the middle region and OP50 region (OP50+NaN3) was determined. Experiments were performed in triplicate with approximately 150 worms *mdt-20(Glu152Gln)* and 50 worms *mdt-20(Lys101Argfs*4)* were counted per condition. Results of statistical test directly above each column is the comparison with wild-type under the same treatment conditions. Non-parametric Kruskal-Wallis tests with uncorrected Dunn’s multiple-comparisons on the proportion of worms in the middle region were used. Ns, P≥0.05; *, P<0.05; **, P<0.01; ***, P<0.001.

**Supplementary Information**

Supplementary Information

**Genetic vignettes of the individuals reported herein with biallelic pathogenic *MED20* variants**

**Clinical vignettes of the individuals reported herein with biallelic pathogenic *MED20* variants**

**Extended references**

Supplementary Tables

**Supplementary Table 1:**

List of MED20 variants identified in a cohort of eight individuals from four families and description of their clinical manifestations*.*

Abbreviations: fs: frameshift; ND: not determined.

**Supplementary Table 2**:

Prediction of the effect of the variation identified for *MED20* (NM_004275.5). Variant effect on the nearest splice site was predicted using SPiP and SpliceAI4,5. Missense effect was assessed by CADD (1.7), PolyPhen-2 (Humdiv/Humvar), SIFT and AlphaMissense6-9. Abbreviations: NA: Not applicable, NC: No significant change

**Supplementary Table 3**:

Homozygous regions identified on chromosome 6 for the 4 affected individuals carrying the c.253C>T (p.Leu85Phe). Coordinates are given according to the GRCh37 human genome build. Genotyping of the 4 affected individuals and 3 unaffected individuals in family 4 using SNP arrays revealed several large homozygous regions on chromosome 3 (ranging from ~5.2 to ~8.7 Mb). The minimal ancestral segment identified by descent represents ~5.2 Mb.

**Supplementary Table 4:**

MED20 variants identified in patients were transposed to the yeast *S. cerevisiae* based on the sequence conservation of Mediator subunits and multiple alignments within eukaryotic kingdom withSignature Sequence Motifs (SSM) that permitted identification of equivalent residues between human (Hs) and yeast (Sc) proteins*48*.

**Supplementary Table 5:**

MED20 pathogenic variants transposed to the nematode *C. elegans* based on the sequence conservation of Mediator subunits and multiple alignments within eukaryotic kingdom *that* permitted identification of equivalent residues between human (Hs) and nematode (Ce) proteins.

**Supplementary Table 6:**

Yeast *S. cerevisiae* strains used in this study.

**Supplementary Table 7:**

List and references of used primers.

**Supplementary Table 8:**

List and references of used antibodies.
