# Supplementary material
Source: Research Square preprint supplement (doi:10.21203/rs.3.rs-9516499/v1)

# Extended Data Figure 6

**A.**

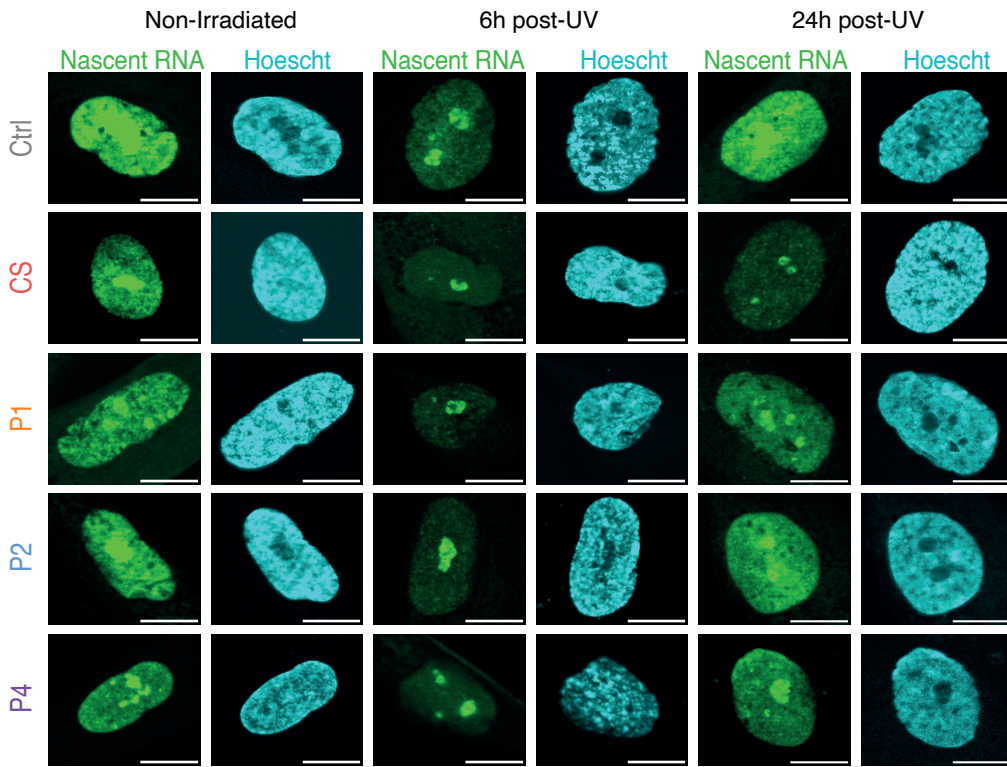

**B.**

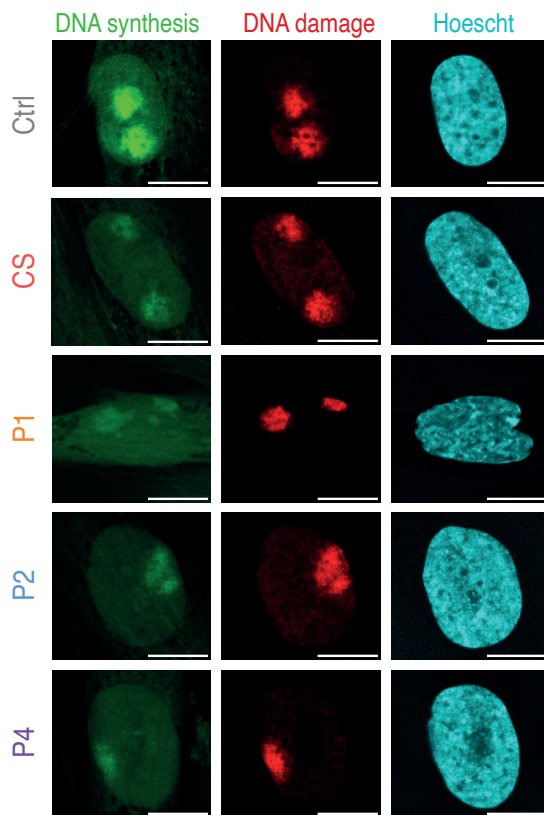

Supplement: Supplementary file 1 [file 01c5d03ec635f6b6595b99f1.pdf]

Extended Data Figure 5

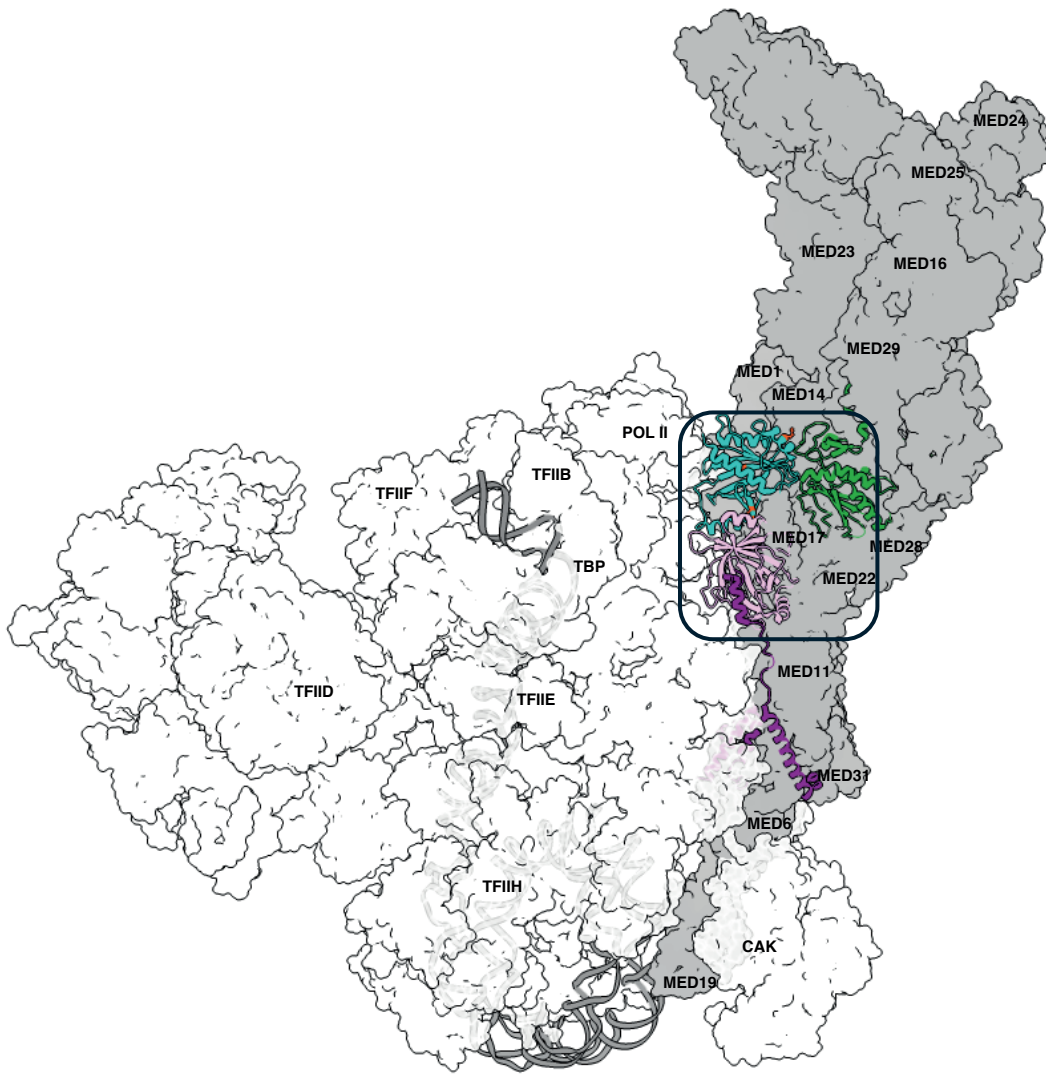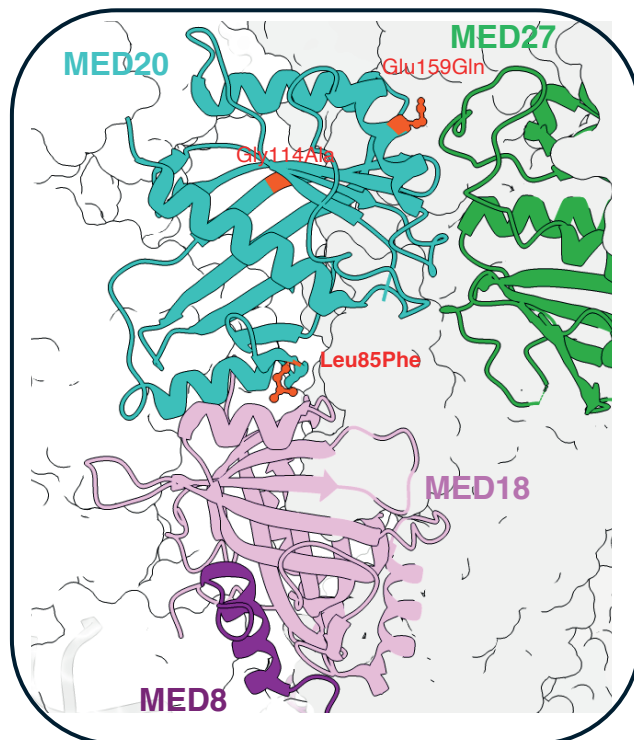

Supplement: Supplementary file 4 [file 40d2d821b6a1a0aca75d4842.pdf]

# Extended Data Figure 4

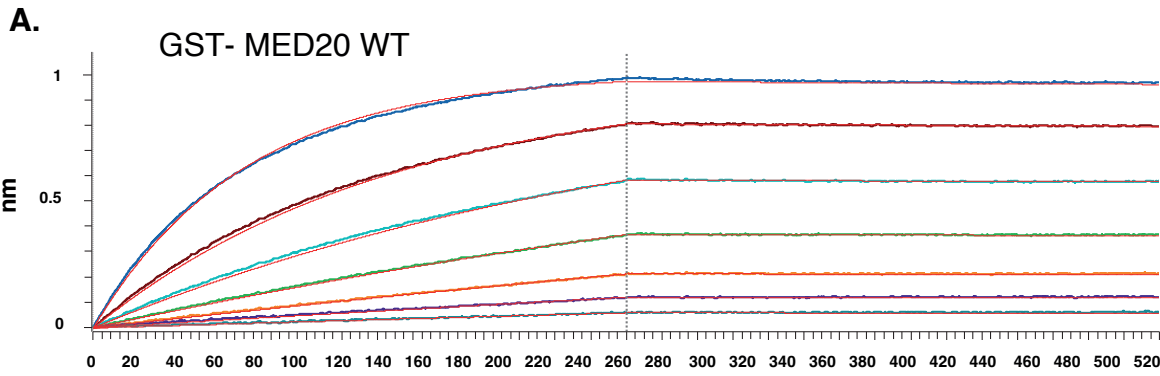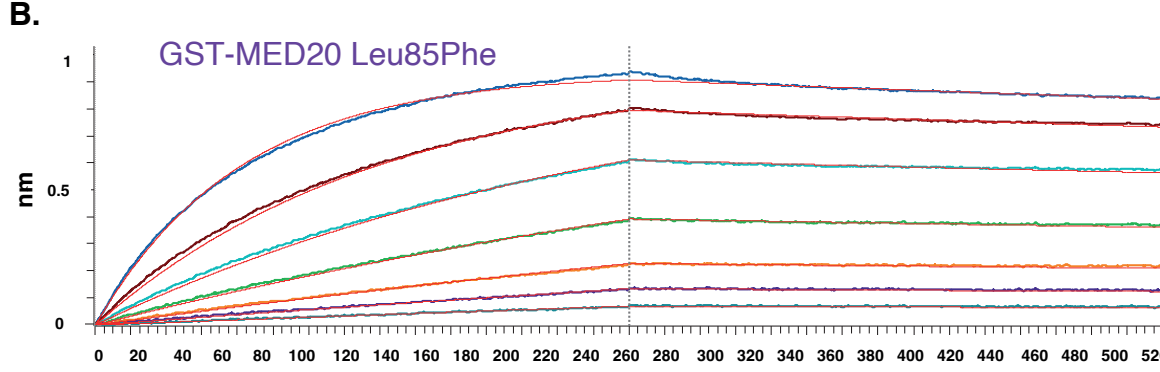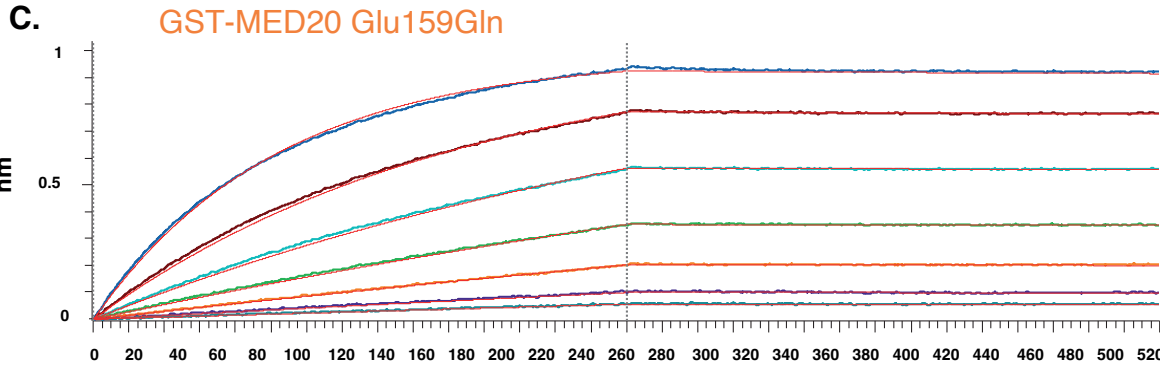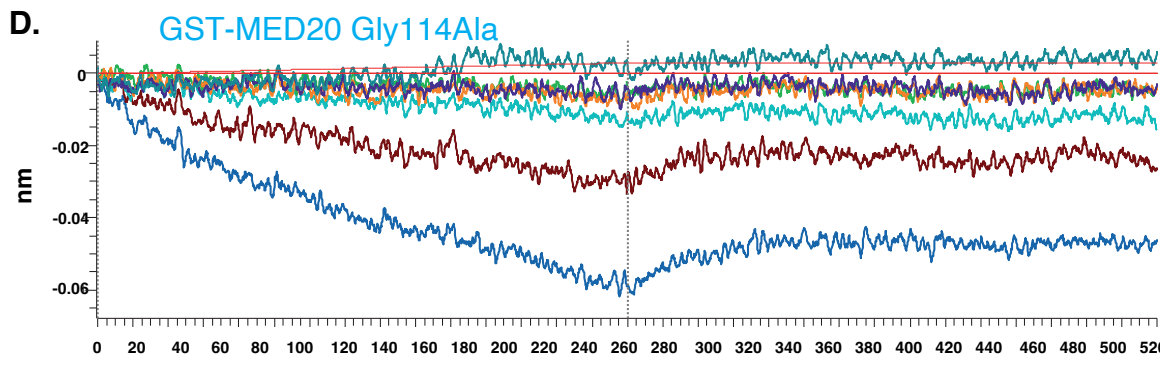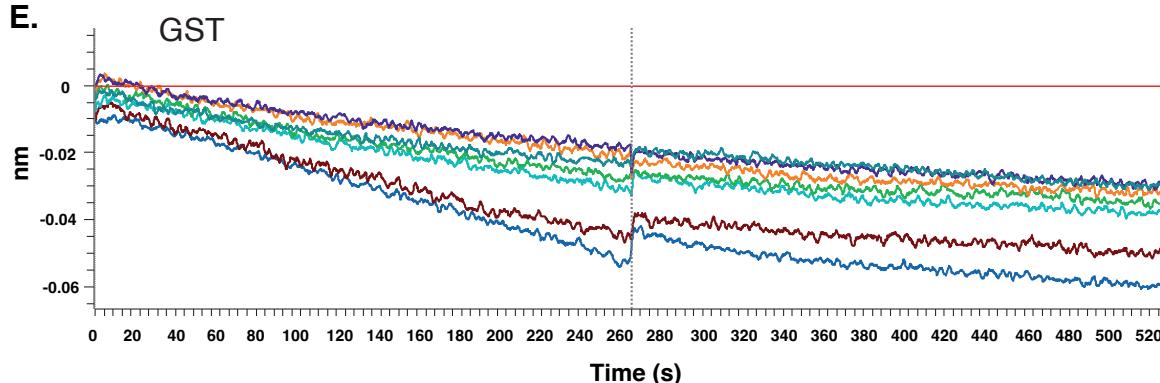

Supplement: Supplementary file 5 [file 541280ab4837ed2997284068.pdf]

# Extended Data Figure 1

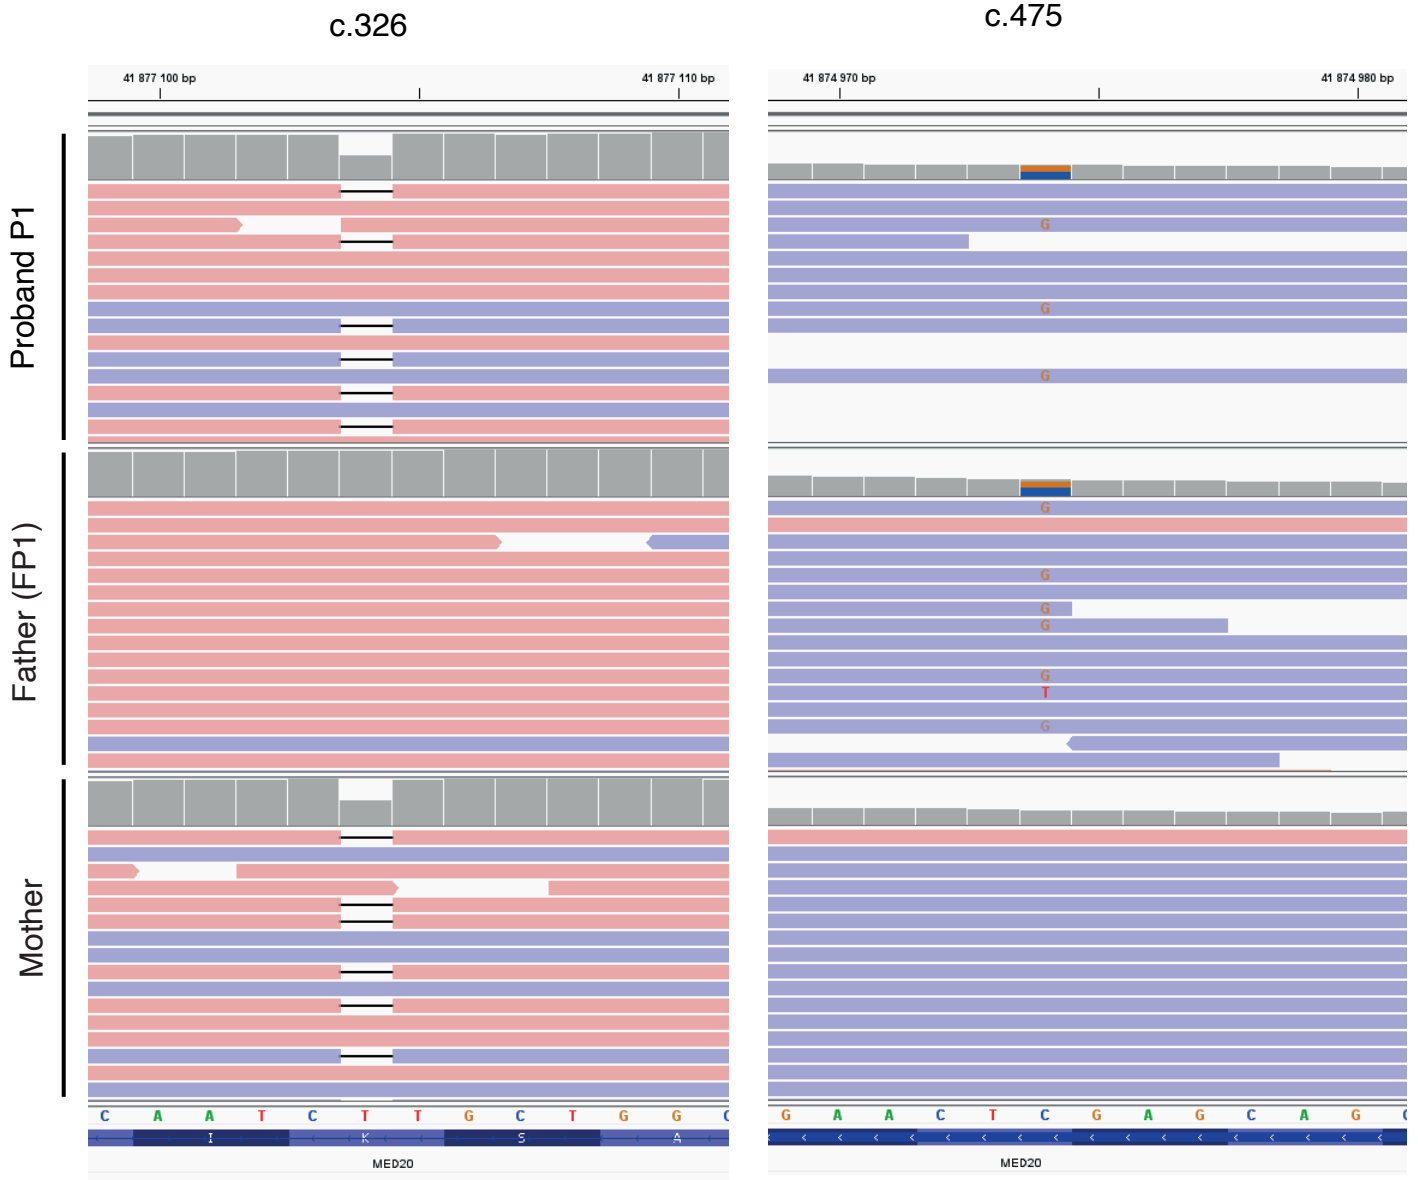

Supplement: Supplementary file 6 [file 6430d70977db979420c7a4a4.pdf]

### Extended Data Figure 3

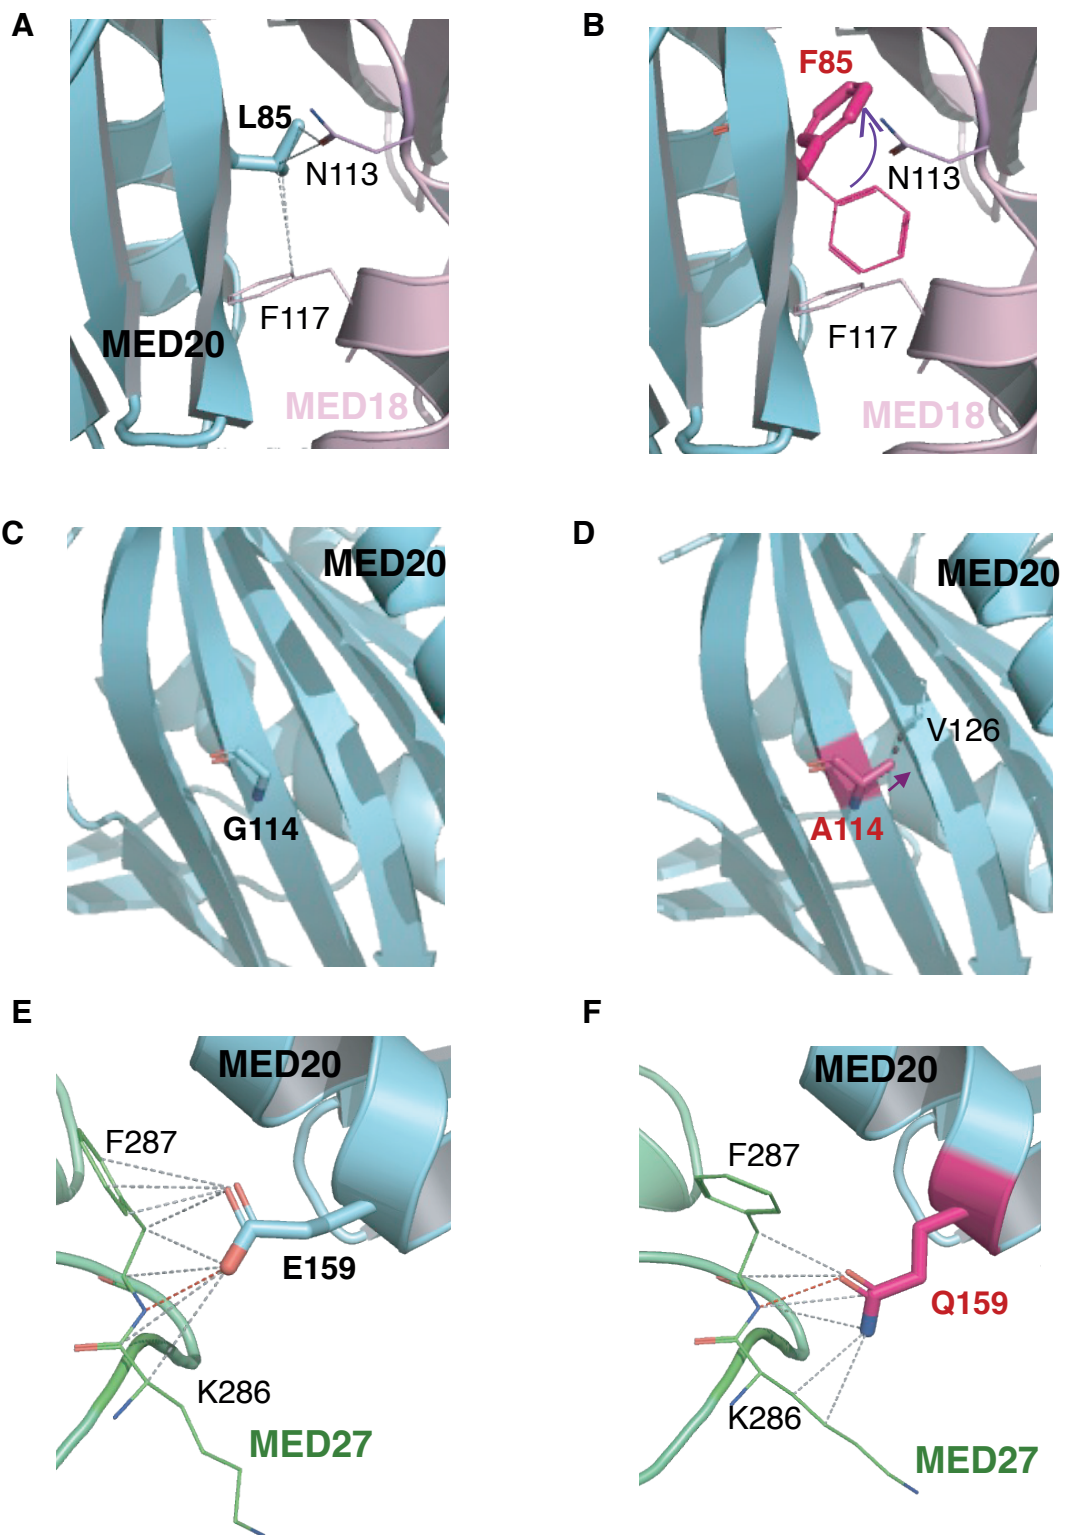

Supplement: Supplementary file 8 [file 868a508081bfe8420cf981aa.pdf]

# Extended Data Figure 7

**A.**

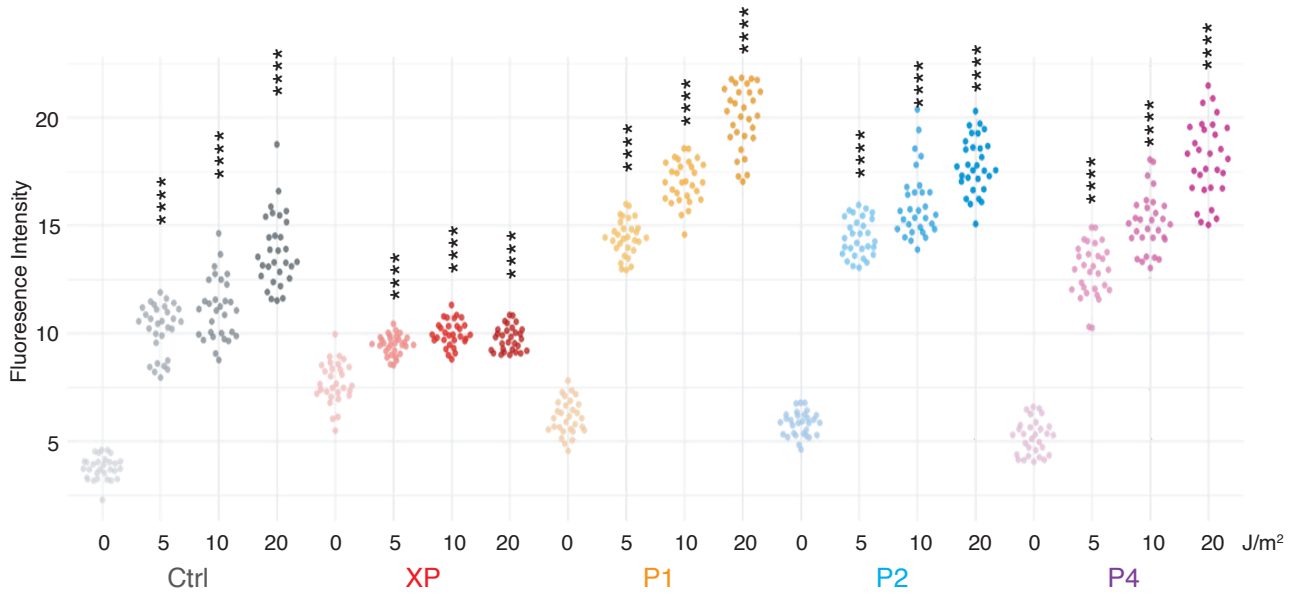

**B.**

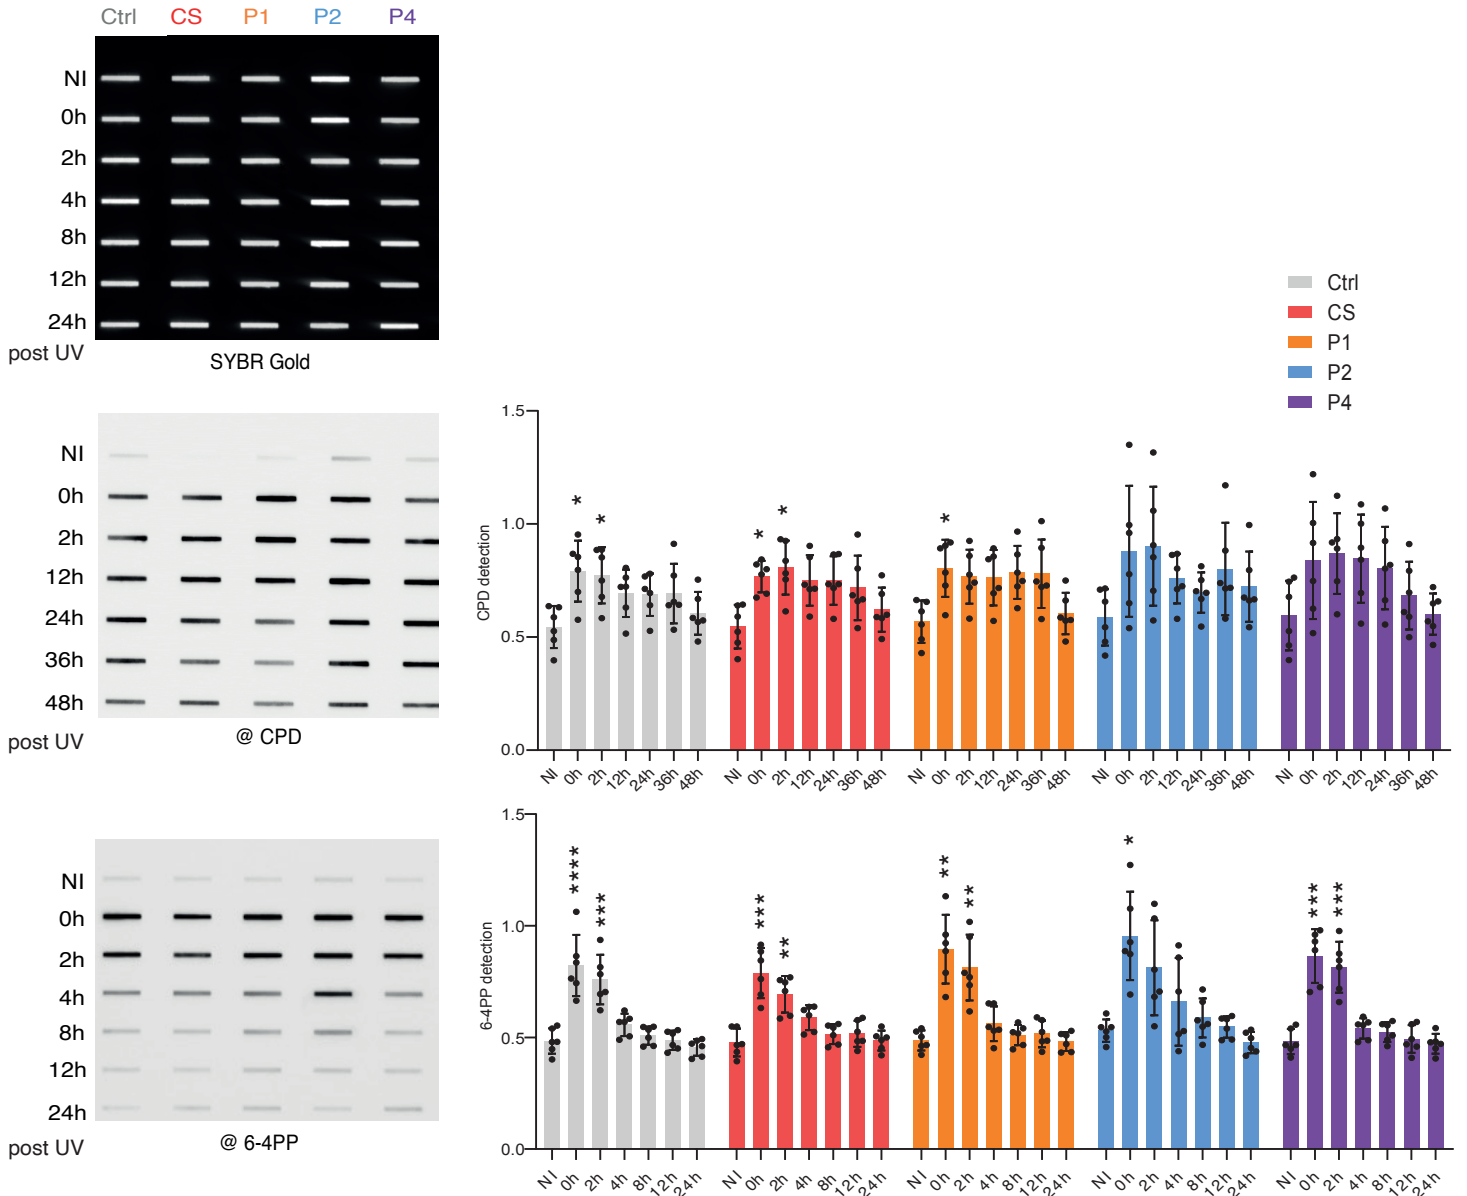

Supplement: Supplementary file 9 [file aed148d538472260be61d0f6.pdf]

# Extended Data Figure 8

**A.**

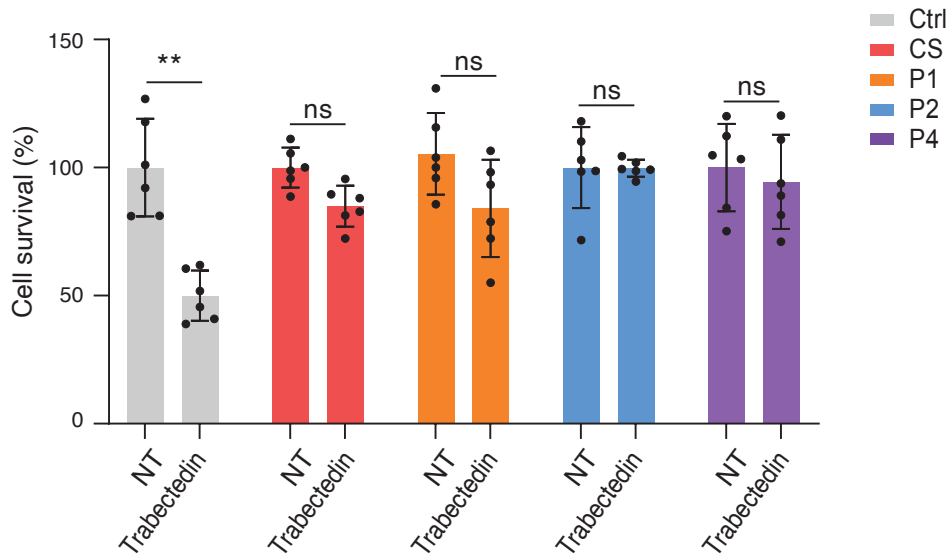

**B.**

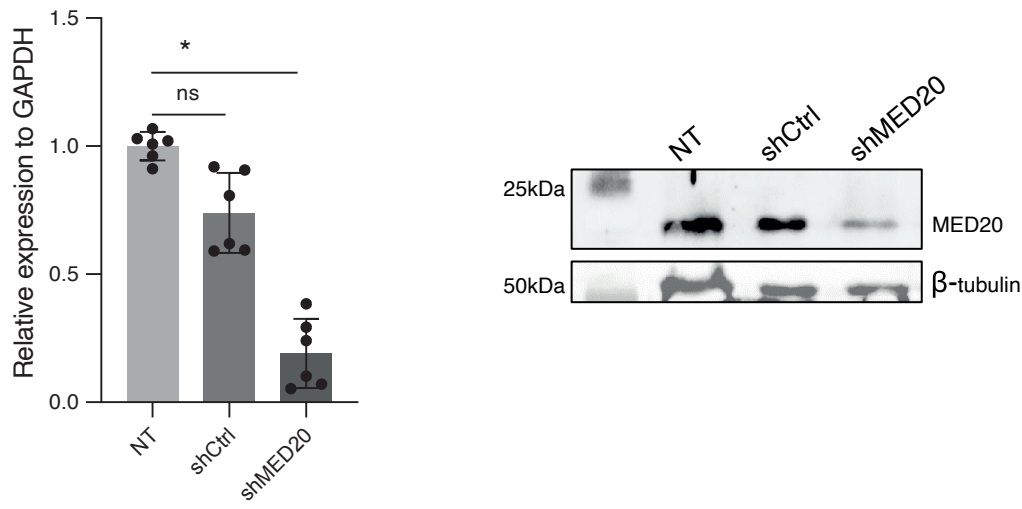

**C.**

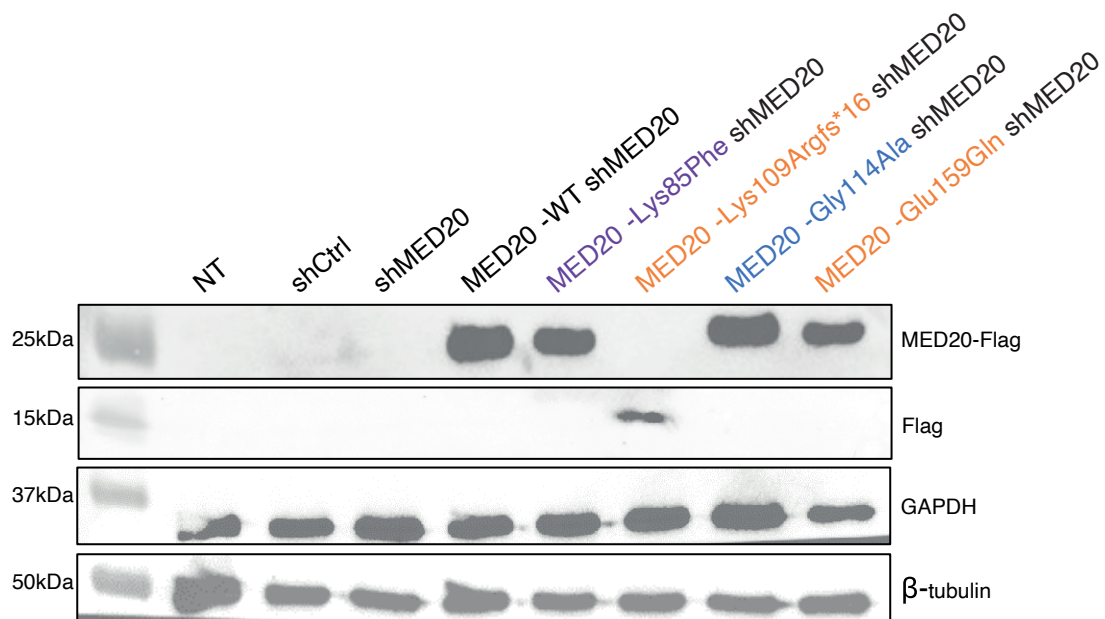

Supplement: Supplementary file 10 [file be7980915ee3d0ed2a3a243d.pdf]

# Extended Data Figure 2

**A.**

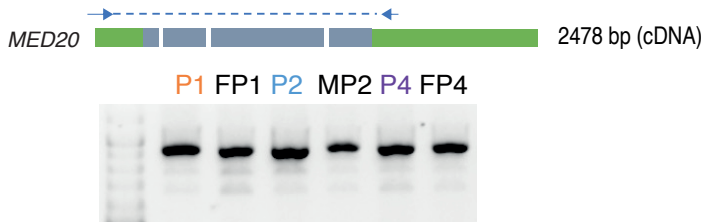

**B.**

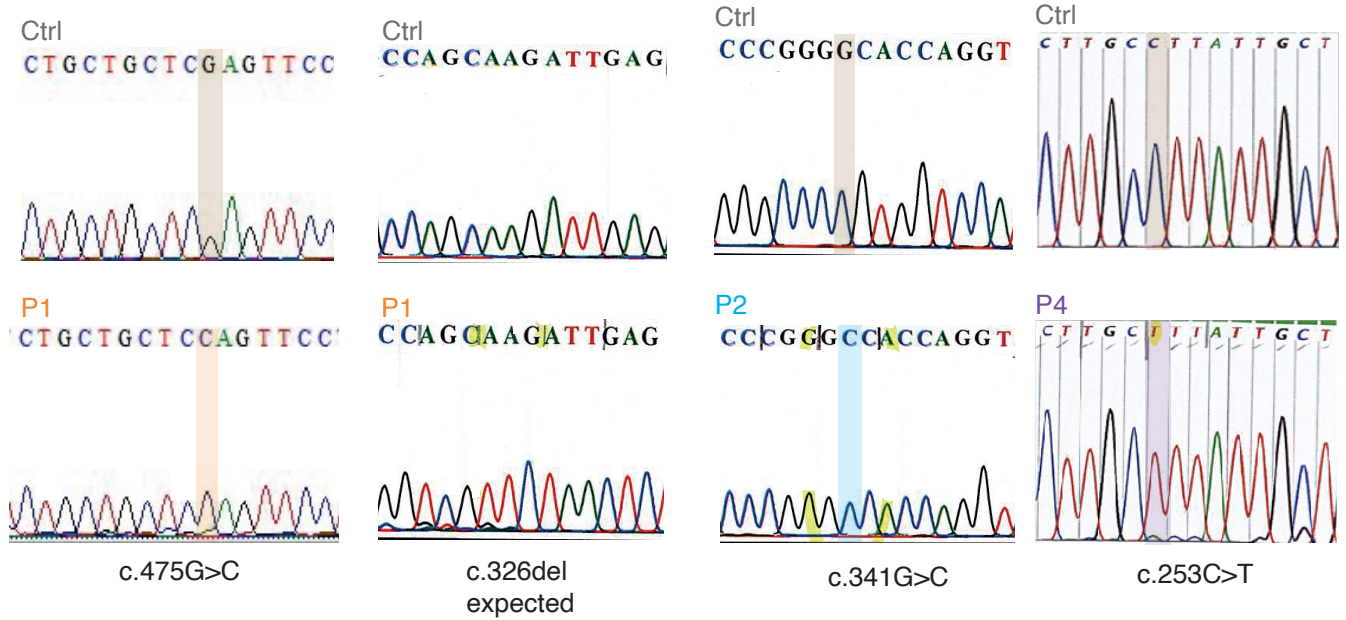

**C.**

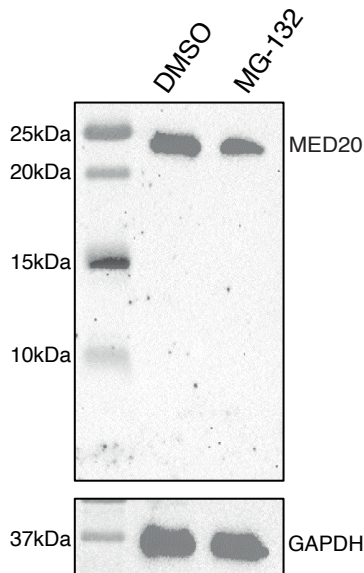

**D.**

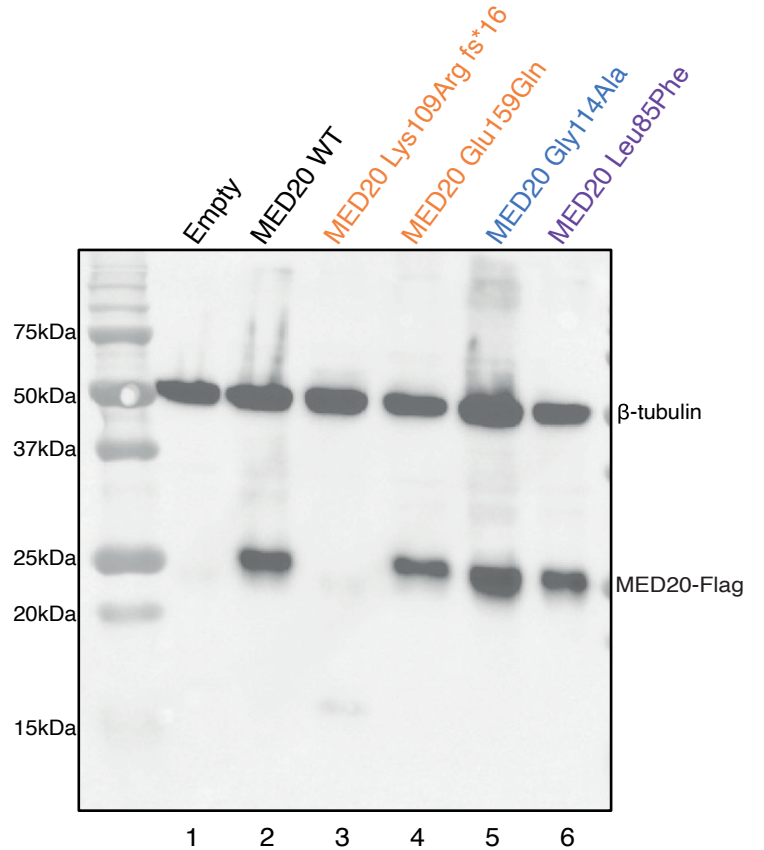

Supplement: Supplementary file 11 [file cb20c71935a57c56361c4bdc.pdf]

# Extended Data Figure 9

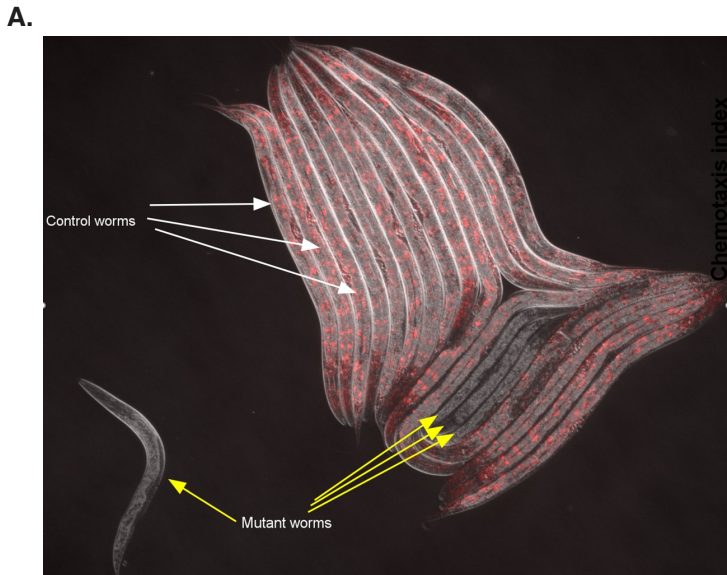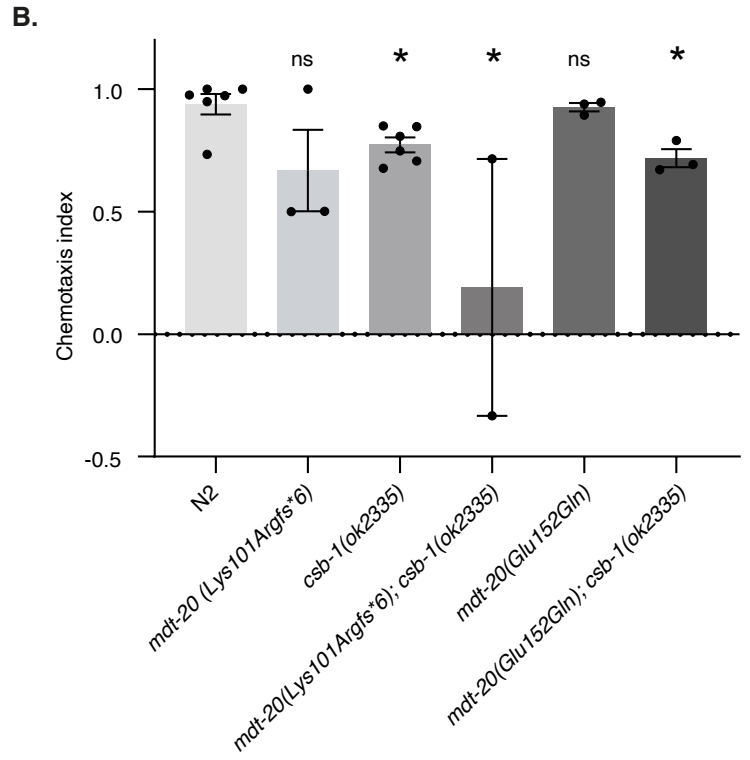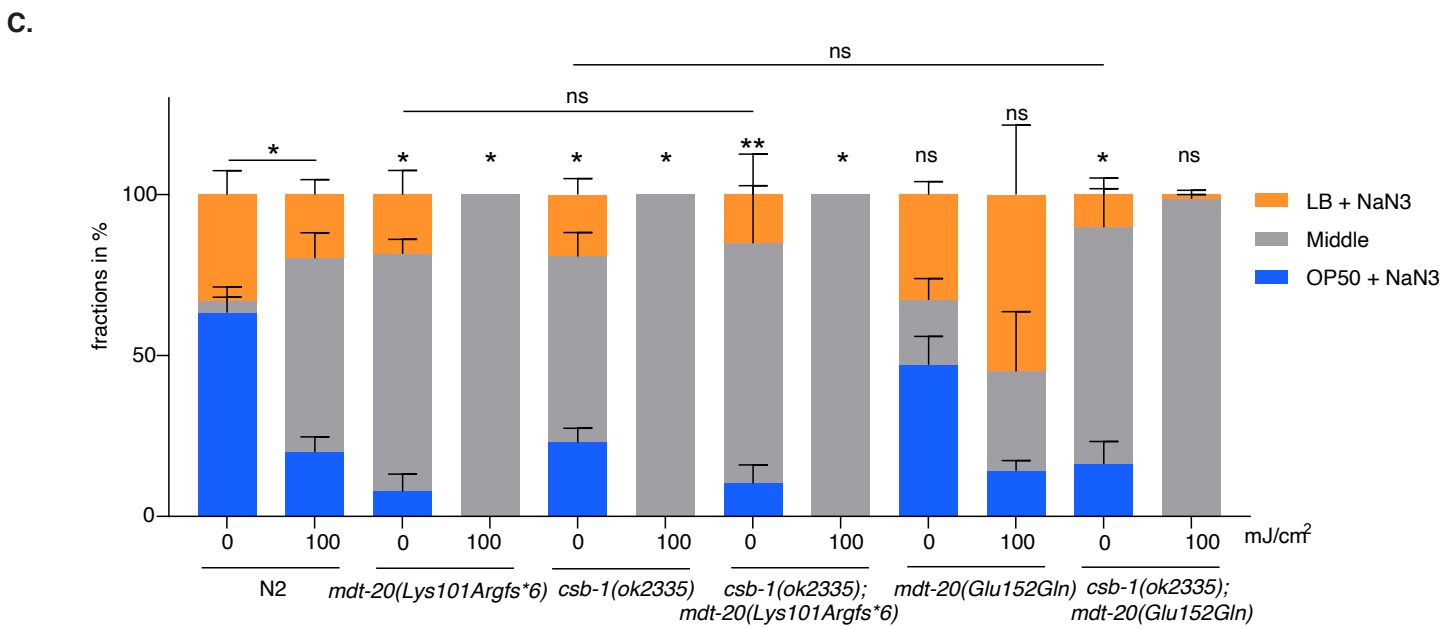

Supplement: Supplementary file 12 [file d65634c2a6b056e75161a7ff.pdf]
